# Supplementary material for: An asparagine residue at the N-terminus affects the maturation process of low molecular weight glutenin subunits of wheat endosperm
Source: PubMed Central journal article supplement (PMC4004387; doi:10.1186/1471-2229-14-64), 2014-03-14
Supplement: 1471-2229-14-64-S1.pdf [file 1471-2229-14-64-S1.pdf]

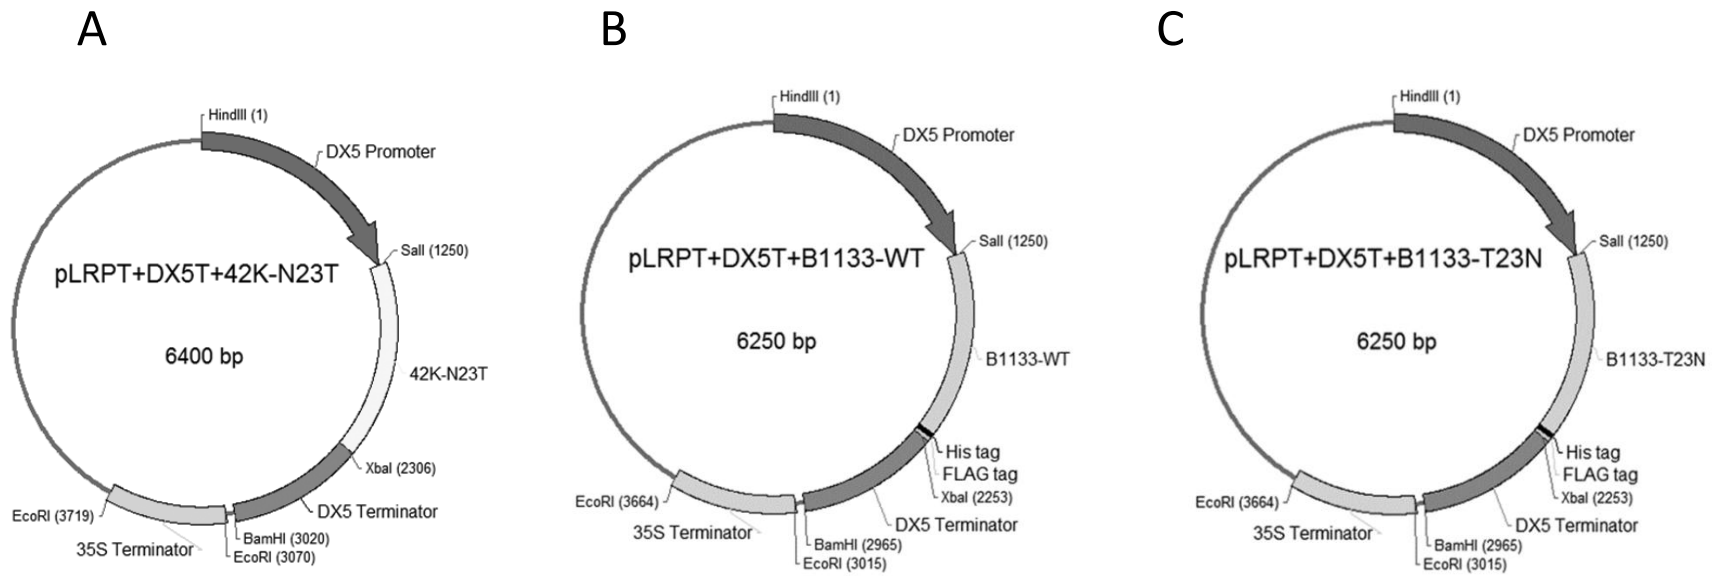

**Figure S1.** Plasmids used for biolistic transformation of durum wheat. pLRPT vector, containing the *Dx5* promoter and *42K-N23T* (A), *B1133-WT* (B) and *B1133-T23N* (C) genes.
