# Supplementary material for: An asparagine residue at the N-terminus affects the maturation process of low molecular weight glutenin subunits of wheat endosperm
Source: PubMed Central journal article supplement (PMC4004387; doi:10.1186/1471-2229-14-64), 2014-03-14
Supplement: 1471-2229-14-64-S2.pdf [file 1471-2229-14-64-S2.pdf]

Table S1

Data for spot 1 showing identified sequence (highlighted in yellow) and a table showing identified peptides and associated ion statistics.

Modifications are shown in green: C, carbamidomethyl cysteine; M, oxidation; Q, deamidation. Note that not all cycteine residues are colored green although all have been converted to carboxymethyl amino cysteine. Modification of cysteine was defined in different Mascot searches as both a fixed and a variable modification in the database searching software. The result is that not all cysteine residues were color coded by the analysis software.

42K-VER-130426-mutated-at-23-no-leader (100%), 37,674.7 Da  
 42K-VER-130426-mutated-at-23-no-leader  
 54 exclusive unique peptides, 66 exclusive unique spectra, 211 total spectra, 298330 amino acids (90% coverage)

|             |            |            |             |             |
|-------------|------------|------------|-------------|-------------|
| METSHIPSL   | KPLDQOPLPL | QQILWYQQQQ | PIQQQPQPP   | QOPPCSQQQ   |
| PLSQQQQP    | FSOQQPPFSO | QQQPVLQOQP | PFSSOQQOQFP | QQQQPPLLPOQ |
| PPFSQQQPP   | SOQQQQPPFS | QQQQQPLLPQ | QPPFSOHOQQP | VLPQQQIIPSV |
| QPSILQQLN   | CKVFLQQQCS | PVAMPQSLAR | SQMLWQSSCH  | VMQQQCCRQL  |
| PQIPEQSR    | AIRAIIVSIV | LQEQQHGGGL | NQPQQOQPOQ  | SVQGVSQPQQ  |
| QQKQLGQCS   | QOPQQOQLGO | WPQQQQVPOG | TLLQPHQIAQ  | LEVMTSIALR  |
| TLPTMLCSVNV | PVYGTITVP  | FGVGTGVGAY |             |             |

| Peptide                     | Amino Acid | Peptide | Mascot      | XI Tandem | Number of identified |                 |               |             | *1H Peptide pt | Peptide     |             |            |     |             |
|-----------------------------|------------|---------|-------------|-----------|----------------------|-----------------|---------------|-------------|----------------|-------------|-------------|------------|-----|-------------|
| Sequence                    | Prior      | Next    | Probability | Ion Score | Identity Score       | Delta ion Score | -log(e) score | +1H spectra | +2H spectra    | +3H spectra | +4H spectra | Mass (AMU) | t i | Start index |
| METSHIPSLKPL                | -          | Q       | 1,00        | 42,7      | 34,4                 | 29,5            | 4,03          |             | 3              |             |             | 1481,77    |     | 1           |
| METSHIPSLKPLQQPLPL          | -          | Q       | 1,00        | 44,7      | 33                   | 42,2            |               |             | 4              |             |             | 2302,21    |     | 1           |
| LQQQPLP                     | P          | L       | 0,99        | 42,8      | 38,4                 | 14              | 0,05          |             |                |             |             | 823,47     |     | 13          |
| LQQQPLPLQQ                  | P          | I       | 1,00        | 43,7      | 36,3                 | 17,5            | 3,40          | 1           |                |             |             | 1192,67    |     | 13          |
| QQQPLPLQQILW                | L          | Y       | 1,00        | 53,5      | 34,9                 | 39,2            | 2,34          | 2           |                |             |             | 1491,83    |     | 14          |
| ILWYQQQQP                   | Q          | I       | 1,00        | 50,2      | 36,1                 | 35,2            | 0,72          | 4           |                |             |             | 1203,62    |     | 23          |
| IQQQPQPPQPPCSQQQPP          | P          | L       | 1,00        | 29,9      | 29,3                 | 29,8            | 1,89          |             | 9              |             |             | 2486,19    |     | 32          |
| FSQQQPPFSQQQPP              | P          | V       | 1,00        | 58,4      | 32,6                 | 27,7            | 2,41          | 2           |                |             |             | 1674,79    |     | 61          |
| VLPQAPP                     | P          | F       | 0,99        | 41,2      | 38,7                 | 12,4            | 1,24          | 1           |                |             |             | 778,45     |     | 75          |
| FSQQQQQFPQQQPP              | P          | L       | 1,00        | 35,6      | 33,7                 | 23,2            | 1,82          | 4           |                |             |             | 1746,82    |     | 82          |
| LLPQAPP                     | P          | F       | 0,98        | 30,3      | 38,5                 |                 | 0,21          | 4           |                |             |             | 792,46     |     | 96          |
| LLPQAPPFSQQQPP              | P          | F       | 1,00        | 34,6      | 33,8                 | 26,7            | 0,85          | 4           |                |             |             | 1604,84    |     | 96          |
| FSQQQQQPP                   | P          | F       | 1,00        | 43        | 37,6                 | 22              | 1,92          | 6           |                |             |             | 1087,52    |     | 110         |
| FSQQQQP                     | P          | L       | 0,99        | 32,3      | 38                   | 13,2            | 0,29          | 3           |                |             |             | 990,46     |     | 119         |
| LLPQAPPFSHQQP               | P          | V       | 1,00        | 49,5      | 33,6                 |                 | 3,72          | 14          | 2              |             |             | 1644,85    |     | 127         |
| LPQAPPFSQH                  | L          | Q       | 1,00        |           |                      |                 | 2,82          | 2           |                |             |             | 1178,60    |     | 128         |
| LPQAPPFSHQQPVLPQQIIPSVQPSIL | L          | V       | 1,00        | 23,8      | 30,9                 | 5,35            | 6,34          | 2           | 2              | 2           |             | 3159,70    |     | 128         |
| PQAPPFSHQQP                 | L          | V       | 1,00        |           |                      |                 | 5,62          | 5           |                |             |             | 1418,68    |     | 129         |
| FSHQQP                      | P          | V       | 0,97        | 34,7      | 37,4                 | 2,92            | 1,10          | 1           |                |             |             | 871,41     |     | 134         |
| SQHQQPVLPQQIIPSVQPSIL       | F          | Q       | 1,00        | 58        | 33                   | 56              | 7,55          |             | 2              |             |             | 2352,27    |     | 135         |
| QQPVLPQQIIPSVQPSIL          | H          | Q       | 1,00        | 39,4      | 33,9                 | 36,7            | 3,89          |             | 2              |             |             | 2000,12    |     | 138         |
| VLPQQIIPS                   | P          | V       | 1,00        | 26        | 37,8                 | 13,2            | 1,60          | 9           |                |             |             | 1009,57    |     | 141         |
| VLPQQIIPSVQPS               | P          | I       | 0,98        |           |                      |                 | 2,09          | 2           |                |             |             | 1420,78    |     | 141         |
| QQIIPSVQPSIL                | Q          | Q       | 0,90        |           |                      |                 | 0,92          | 1           |                |             |             | 1209,68    |     | 145         |
| QQLNPCKVF                   | L          | L       | 1,00        | 45,9      | 35,4                 | 26,1            | 3,04          | 3           |                |             |             | 1133,58    |     | 156         |
| LNPCKVF                     | Q          | L       | 0,99        | 43        | 38,5                 | 19,1            | 0,51          | 5           |                |             |             | 877,46     |     | 158         |
| LQQQCSP                     | F          | V       | 0,95        | 35,7      | 38,9                 |                 | -2,79         | 1           |                |             |             | 860,39     |     | 165         |
| LQQQCSPVAMPQ                | F          | S       | 1,00        |           |                      |                 | 2,59          | 2           |                |             |             | 1386,65    |     | 165         |
| LWQSSCH                     | M          | V       | 0,99        | 25,1      | 38                   | 5,68            | 0,75          | 4           |                |             |             | 917,39     |     | 184         |
| QSSCHVM                     | W          | Q       | 0,99        | 39,5      | 35,1                 | 15,2            | 0,70          | 1           |                |             |             | 848,34     |     | 186         |
| VMQQCCCRQLPQIPEQSR          | H          | I       | 1,00        |           |                      |                 | 3,77          |             | 2              |             |             | 2635,22    |     | 191         |
| MQQCCCRQLPQIPEQ             | V          | S       | 1,00        |           |                      |                 | 3,48          |             | 1              |             |             | 2057,93    |     | 192         |
| CCRQLPQIPEQSR               | Q          | D       | 1,00        | 0         |                      |                 | 3,10          |             | 2              |             |             | 1834,87    |     | 196         |
| RQLPQIPEQSR                 | C          | D       | 1,00        |           |                      |                 | 4,66          |             | 1              | 1           |             | 1514,81    |     | 198         |
| LPQIPEQSR                   | Q          | I       | 1,00        | 36,7      | 34,6                 | 7,86            | 6,85          | 2           |                |             |             | 1416,71    |     | 200         |
| SIVLQEQHGGGL                | Y          | N       | 1,00        | 67,3      | 34,9                 | 17,1            | 5,46          | 1           | 1              |             |             | 1436,75    |     | 218         |
| IVLQEQHGGG                  | S          | L       | 1,00        | 48,7      | 35,6                 | 18,8            | 5,09          | 19          |                |             |             | 1236,63    |     | 219         |
| LNQPPQQPQQS                 | G          | V       | 1,00        | 46,9      | 35,3                 | 39,8            | 6,77          | 13          |                |             |             | 1423,69    |     | 230         |
| VQGVSPQQQQKQ                | S          | L       | 1,00        | 55,2      | 33,5                 | 48,4            | 7,22          | 1           |                |             |             | 1482,77    |     | 242         |
| GVSQPPQQQKQL                | Q          | G       | 1,00        |           |                      |                 | 4,59          | 2           |                |             |             | 1368,72    |     | 244         |
| VSQPPQQQKQ                  | G          | L       | 1,00        | 74,2      | 36,5                 | 61,7            | 5,18          | 12          |                |             |             | 1198,62    |     | 245         |
| QQKQLGQCSF                  | Q          | Q       | 0,99        |           |                      |                 | 1,85          | 1           |                |             |             | 1351,64    |     | 250         |
| LGQCSFQQPQQQ                | Q          | L       | 1,00        | 60,2      | 33,7                 | 56,5            | 5,18          | 1           |                |             |             | 1576,72    |     | 255         |
| FQQPQQQ                     | S          | L       | 1,00        | 30,5      | 38                   | 0,56            | 1,35          | 2           |                |             |             | 1031,49    |     | 260         |

|               |   |   |      |      |      |      |      |   |         |     |
|---------------|---|---|------|------|------|------|------|---|---------|-----|
| QQPQQQL       | F | G | 1,00 | 44,2 | 34,9 | 9,53 | 2,27 | 2 | 997,51  | 261 |
| LGQWPQQQVPQGT | Q | L | 1,00 | 35,8 | 33,7 |      | 2,72 | 4 | 1594,80 | 268 |
| LGQWPQQQVPQGT | Q | L | 1,00 | 52   | 32,8 |      | 3,62 | 7 | 1707,88 | 268 |
| LLQPHQ        | T | I | 0,90 | 31,6 | 38,9 | 1,34 | 2,54 | 1 | 735,41  | 282 |
| LQPHQIQL      | L | E | 1,00 | 32,4 | 34,8 |      | 1,01 | 2 | 1047,59 | 283 |
| LRTLPTMCS     | A | V | 1,00 | 48,6 | 37,5 | 37,2 |      | 5 | 1094,53 | 299 |
| RTLPTMCSVNPVY | L | G | 0,96 | 42,5 | 34,6 | 40,3 |      | 1 | 1652,81 | 300 |
| VYGTIT        | P | I | 0,90 | 33,8 | 36,7 | 8,01 | 0,47 |   | 641,31  | 312 |
| FGVGTGVG      | P | A | 1,00 | 32   | 38,2 | 17,1 | 3,92 |   | 693,36  | 321 |
| GVGTGVGA      | F | - | 0,92 |      |      |      | 1,26 |   | 617,33  | 322 |
