# Supplementary material for: An asparagine residue at the N-terminus affects the maturation process of low molecular weight glutenin subunits of wheat endosperm
Source: PubMed Central journal article supplement (PMC4004387; doi:10.1186/1471-2229-14-64), 2014-03-14
Supplement: 1471-2229-14-64-S3.pdf [file 1471-2229-14-64-S3.pdf]

Table S2

Data for spot 3 showing identified sequence (highlighted in yellow) and a table showing identified peptides and associated ion statistics.

Modifications are shown in green: C, carbamidomethyl cysteine; M, oxidation; Q, deamidation. Note that not all cysteine residues are colored green although all have been converted to carboxymethyl amino cysteine. Modification of cysteine was defined in different Mascot searches as both a fixed and a variable modification in the database searching software. The result is that not all cysteine residues were color coded by the analysis software.

HB1133-WILD\_TYPE-LRWT (100%), 34,050.4 Da  
 Leader-Removed with tag  
 38 exclusive unique peptides, 47 exclusive unique spectra, 160 total spectra, 239/298 amino acids (80% coverage)

```

METS C I F G L E R P W Q O O P L P P Q O S F S Q Q Q P P F S Q Q Q Q Q P L P Q Q P S F S Q Q Q P P
F S O O Q P I L S Q O P P F S O O Q O P V L P O O S P F S Q Q Q L V L P P O O O O O L V Q O O I
P I V Q P S V L Q Q L N P C K V F L O O Q E S P V A M P Q R L A R S Q M W Q O S S C H V M O O Q C C
O O L Q O I P E Q S R Y E A I R A I I Y S I I L Q E O O Q O Q F V O P O O Q O P O S G O G V S O S Q
Q O S Q O O L G Q C S F Q Q P Q Q Q L G Q Q P Q O O O O O O O V L Q G T F L O P H O I A H L E A V T S
I A L R T L P T M C S V N V P L Y S A T T S V P F G V G T G V G A Y H H H H H H D Y K D D D D K
  
```

| Peptide                                                                                            | Amino Acid | Peptide | Mascot      | X! Tandem | Number of identified |                 |               |             | +1H Peptide | Peptide     |             |            |             |
|----------------------------------------------------------------------------------------------------|------------|---------|-------------|-----------|----------------------|-----------------|---------------|-------------|-------------|-------------|-------------|------------|-------------|
| Sequence                                                                                           | Prior      | Next    | Probability | Ion Score | Identity Score       | Delta Ion Score | -log(e) score | +1H spectra | +2H spectra | +3H spectra | +4H spectra | Mass (AMU) | Start index |
| METS C I F G L E R P W Q O O P L P P Q O S F S Q Q Q P P F S Q Q Q Q Q P L P Q Q P S F S Q Q Q P P | -          | G       | 0,90        | 51,90     | 34,20                | 39,30           |               | 2           |             |             |             | 1837,83    | 1           |
| GLER P W Q Q Q P L P P Q Q S F                                                                     | F          | S       | 1,00        |           |                      |                 | 7,38          |             | 1           |             |             | 951,46     | 8           |
| Q Q Q P L P P Q Q S F                                                                              | W          | S       | 1,00        | 56,20     | 31,70                | 46,90           |               |             | 18          |             |             | 948,55     | 14          |
| S Q Q Q P I L S Q Q P P F S Q Q Q Q P V L P Q Q S P F                                              | F          | S       | 1,00        |           |                      |                 | 3,14          |             |             | 1           |             | 2220,20    | 52          |
| P P F S Q Q Q P V L P Q Q S P F                                                                    | Q          | S       | 1,00        |           |                      |                 | 2,62          |             | 1           |             |             | 2036,04    | 62          |
| S Q Q Q Q P V L P Q Q S P F                                                                        | F          | S       | 1,00        | 55,70     | 32,10                | 13,90           |               |             | 2           |             |             | 1537,77    | 65          |
| V L P P Q Q Q Q Q                                                                                  | L          | Q       | 1,00        |           |                      |                 | 3,52          |             | 5           |             |             | 780,39     | 85          |
| V L P P Q Q Q Q Q L                                                                                | L          | V       | 1,00        |           |                      |                 | 3,89          |             | 7           | 1           |             | 1835,76    | 85          |
| V L P P Q Q Q Q Q L V Q Q Q I P I V Q P S V L                                                      | L          | Q       | 1,00        | 45,30     | 26,90                | 4,30            |               |             |             | 1           | 2           | 1056,60    | 85          |
| L V Q Q Q I P I V Q P S V L                                                                        | Q          | Q       | 1,00        |           |                      |                 | 3,96          |             | 1           |             |             | 1841,03    | 95          |
| V Q Q Q I P I V Q P S V L                                                                          | L          | Q       | 1,00        | 74,60     | 32,00                | 49,10           |               | 1           | 12          |             |             | 1386,65    | 96          |
| P I V Q P S V L                                                                                    | I          | Q       | 0,99        |           |                      |                 | 4,49          | 5           |             |             |             | 1655,84    | 101         |
| V L Q Q L N P C K V F                                                                              | S          | L       | 1,00        |           |                      |                 | 5,26          |             | 1           |             |             | 1561,93    | 107         |
| Q Q L N P C K V F                                                                                  | L          | L       | 1,00        | 43,70     | 33,60                | 25,30           |               | 2           | 6           |             |             | 903,36     | 109         |
| L Q Q C S P V A M P Q                                                                              | F          | R       | 1,00        |           |                      |                 | 2,10          |             | 1           |             |             | 815,45     | 118         |
| L Q Q C S P V A M P Q R L                                                                          | F          | A       | 1,00        | 75,60     | 31,30                | 49,70           |               |             | 2           |             |             | 852,52     | 118         |
| Q Q S S C H V M                                                                                    | W          | Q       | 0,93        | 43,50     | 34,50                |                 |               |             | 1           |             |             | 1952,99    | 138         |
| Q Q S S C H V M Q Q Q                                                                              | W          | C       | 1,00        |           |                      |                 | 2,70          |             | 1           |             |             | 1472,76    | 138         |
| C C Q Q L Q Q I P E Q S R Y                                                                        | Q          | E       | 1,00        |           |                      |                 | 5,85          |             | 1           |             |             | 2274,22    | 149         |
| Q Q I P E Q S R Y                                                                                  | L          | E       | 1,00        | 58,50     | 32,90                | 42,20           |               |             | 7           |             |             | 1148,57    | 154         |
| E A I R A I I Y                                                                                    | Y          | S       | 0,99        | 47,00     | 33,90                | 12,70           |               |             | 6           |             |             | 1133,58    | 163         |
| E A I R A I I Y S I I L Q E Q Q Q G F                                                              | Y          | V       | 1,00        |           |                      |                 | 15,00         |             |             | 1           |             | 1297,65    | 163         |
| S I I L Q E Q Q G F                                                                                | Y          | V       | 1,00        | 87,90     | 33,00                | 76,40           |               | 1           | 16          |             |             | 976,40     | 171         |
| V Q P Q Q Q Q P Q                                                                                  | F          | Q       | 1,00        |           |                      |                 | 1,77          |             | 1           |             |             | 1360,57    | 182         |
| V Q P Q Q Q Q P Q Q S G Q                                                                          | F          | G       | 0,99        |           |                      |                 | 1,96          |             | 1           |             |             | 878,42     | 182         |
| V Q P Q Q Q Q P Q Q S G Q G V S Q S Q Q Q S Q Q Q L                                                | F          | G       | 1,00        |           |                      |                 | 6,62          |             |             | 2           |             | 1487,77    | 182         |
| G Q Q P Q Q Q Q Q Q V L                                                                            | L          | Q       | 1,00        | 69,00     | 31,70                | 49,90           |               |             | 2           |             | 2           | 1650,83    | 220         |
| Q G T F L Q P H Q I A H L                                                                          | L          | E       | 1,00        |           |                      |                 | 7,96          |             | 1           |             |             | 1290,67    | 233         |
| Q G T F L Q P H Q I A H L E A V T S I A L                                                          | L          | R       | 1,00        |           |                      |                 | 2,50          |             |             | 1           |             | 3090,56    | 233         |
| L Q P H Q I A H L                                                                                  | F          | E       | 1,00        |           |                      |                 | 2,89          |             | 8           |             |             | 1611,81    | 237         |
| L Q P H Q I A H L E A V T S I A L                                                                  | F          | R       | 1,00        |           |                      |                 | 2,46          |             | 3           | 1           |             | 1065,57    | 237         |
| P H Q I A H L                                                                                      | Q          | E       | 0,90        |           |                      |                 | 2,96          |             | 2           |             |             | 1306,71    | 239         |
| R T L P T M C                                                                                      | L          | S       | 0,90        |           |                      |                 | 4,11          | 1           |             |             |             | 2736,54    | 254         |
| R T L P T M C S V N V P L                                                                          | L          | Y       | 1,00        | 61,30     | 32,90                | 49,00           |               |             | 12          |             |             | 1345,73    | 254         |
| R T L P T M C S V N V P L Y                                                                        | L          | S       | 1,00        |           |                      |                 | 2,57          |             | 2           |             |             | 1080,54    | 254         |
| C S V N V P L Y                                                                                    | M          | S       | 0,99        | 36,20     | 33,70                | 25,90           |               | 1           |             |             |             | 1480,71    | 260         |
| G V G T G V G A Y                                                                                  | F          | H       | 0,98        | 47,20     | 34,60                | 5,87            |               | 1           |             |             |             | 2907,39    | 276         |
| H H H H H D Y K D D D D K                                                                          | Y          | -       | 1,00        | 73,30     | 31,60                | 58,20           |               |             |             | 6           |             | 1448,85    | 285         |
