# Supplementary material for: An asparagine residue at the N-terminus affects the maturation process of low molecular weight glutenin subunits of wheat endosperm
Source: PubMed Central journal article supplement (PMC4004387; doi:10.1186/1471-2229-14-64), 2014-03-14
Supplement: 1471-2229-14-64-S4.pdf [file 1471-2229-14-64-S4.pdf]

Table S3

Data for spot 4 showing identified sequence (highlighted in yellow) and a table showing identified peptides and associated ion statistics.

Modifications are shown in green: C, carbamidomethyl cysteine; M, oxidation; Q, deamidation. Note that not all cysteine residues are colored green although all have been converted to carboxymethyl amino cysteine. Modification of cysteine was defined in different Mascot searches as both a fixed and a variable modification in the database searching software. The result is that not all cysteine residues were color coded by the analysis software.

HB1133-WILD\_TYPE-LRW7 (100%), 34,050.4 Da

Leader-R removed with tag

31 exclusive unique peptides, 39 exclusive unique spectra, 118 total spectra, 222,298 amino acids (74% coverage)

|   |   |   |   |   |   |   |   |   |   |   |   |   |   |   |   |   |   |   |   |   |   |   |   |   |   |   |   |   |   |   |   |   |   |   |   |   |   |   |   |   |   |   |   |   |   |   |   |   |   |
|---|---|---|---|---|---|---|---|---|---|---|---|---|---|---|---|---|---|---|---|---|---|---|---|---|---|---|---|---|---|---|---|---|---|---|---|---|---|---|---|---|---|---|---|---|---|---|---|---|---|
| M | E | T | S | C | I | F | G | L | E | R | P | W | Q | O | O | P | L | P | P | Q | O | S | F | S | Q | O | P | P | F | S | Q | Q | O | O | P | L | P | O | O | P | S | F | S | Q | Q | P | P |   |   |
| F | S | Q | Q | P | I | L | S | Q | Q | P | P | F | S | Q | Q | P | P | V | L | P | Q | Q | S | P | F | S | Q | Q | Q | L | V | L | P | P | O | O | Q | O | O | L | V | Q | Q | O | I |   |   |   |   |
| P | I | V | Q | P | S | V | L | Q | Q | L | N | P | C | K | V | F | L | Q | Q | O | C | S | P | V | A | M | P | O | R | L | A | R | S | Q | M | W | Q | O | S | S | C | H | V | M | Q | Q | C | C |   |
| Q | O | L | Q | O | I | P | E | O | S | R | Y | E | A | I | R | A | I | I | Y | S | I | L | Q | E | O | O | O | Q | F | V | O | P | O | O | O | P | O | O | S | G | O | G | V | S | O | S | O |   |   |
| Q | O | S | Q | O | L | G | Q | C | S | F | Q | Q | P | Q | Q | L | G | Q | Q | P | Q | Q | Q | Q | Q | Q | V | L | G | T | F | L | O | P | H | O | I | A | H | L | E | A | V | T | S |   |   |   |   |
| I | A | L | R | T | L | P | T | M | G | S | V | N | V | P | L | Y | S | A | T | T | S | V | P | F | G | V | G | T | G | V | G | A | Y | H | H | H | H | H | H | D | Y | K | D | D | D | D | D | D | K |

| Peptide                  | Amino Acid | Peptide | Mascot      | X! Tandem | Number of identified | +1H Peptide     | Peptide       |             |             |             |             |            |         |             |    |
|--------------------------|------------|---------|-------------|-----------|----------------------|-----------------|---------------|-------------|-------------|-------------|-------------|------------|---------|-------------|----|
| Sequence                 | Prior      | Next    | Probability | Ion Score | Identity Score       | Delta Ion Score | -log(e) score | +1H spectra | +2H spectra | +3H spectra | +4H spectra | Mass (AMU) | t       | Start index |    |
| METSCIF                  | -          | G       | 0.98        | 46.4      | 32.4                 | 38              |               |             |             |             |             | 903.36     |         | 1           |    |
| GLERPW                   | F          | Q       | 1.00        | 40.9      | 32.1                 | 20              | 1.42          | 1           | 2           |             |             | 757.40     |         | 8           |    |
| GLERPWQQQLPPQQSF         | F          | S       | 1.00        |           |                      |                 | 19.20         |             |             | 1           |             | 2036.04    |         | 8           |    |
| QQQLPPQQSF               | W          | S       | 1.00        | 63        | 30.3                 | 46.4            | 5.68          |             | 16          |             |             | 1297.65    |         | 14          |    |
| IVNGEEAVPGSWPWQVSLQDKTGF | R          | H       | 1.00        |           |                      |                 | 7.74          |             |             | 1           |             | 2644.30    |         | 16          |    |
| SQQPPFSQQQLPQQPSF        | F          | S       | 1.00        | 57.2      | 27.8                 | 57.2            | 5.02          |             |             | 1           |             | 2325.13    |         | 25          |    |
| QVSLQDKTGF               | W          | H       | 1.00        | 73.5      | 32.1                 | 49.5            | 3.70          |             | 4           |             |             | 1122.58    |         | 30          |    |
| DQGSSEKIQ                | F          | K       | 1.00        |           |                      |                 | 4.62          |             |             | 1           |             | 1078.50    |         | 72          |    |
| DQGSSEKIQKL              | F          | K       | 1.00        | 56.4      | 31.3                 | 46.7            | 6.85          |             |             | 2           |             | 1319.68    |         | 72          |    |
| KIAKVF                   | L          | K       | 1.00        | 32.7      | 33.1                 | 3.53            | 2.96          | 1           |             | 3           |             | 705.47     |         | 84          |    |
| VLPQQQQQ                 | L          | Q       | 0.98        |           |                      |                 | 3.00          |             |             | 1           |             | 1065.57    |         | 85          |    |
| VLPQQQQQL                | L          | V       | 1.00        | 31.7      | 31.4                 | 15.8            | 5.57          |             |             | 4           |             | 1306.71    |         | 85          |    |
| VLPQQQQQLVQQQIPVQPSVL    | L          | Q       | 1.00        | 50.6      | 25.4                 | 50.6            | -1.97         |             |             |             | 4           | 1          | 2736.54 |             | 85 |
| VQQQIPVQPSVL             | L          | Q       | 1.00        | 51.8      | 31.2                 | 38.4            | 3.96          |             | 11          |             |             | 1448.85    |         | 96          |    |
| TINNDILL                 | L          | K       | 1.00        | 53.3      | 31.5                 | 15.2            | 0.70          | 2           |             | 1           |             | 1016.56    |         | 98          |    |
| KLSTAASF                 | L          | S       | 1.00        | 53.4      | 31.7                 | 16.6            | 1.96          | 3           |             |             |             | 824.45     |         | 107         |    |
| QQLNPKVVF                | L          | L       | 1.00        | 39.2      | 33.9                 | 20.9            | 4.72          | 2           |             |             | 7           | 1133.58    |         | 109         |    |
| LQQGCSPVAMPQ             | F          | R       | 0.93        |           |                      |                 | 2.16          |             |             | 1           |             | 1386.65    |         | 118         |    |
| QQSSCHVM                 | W          | Q       | 1.00        | 60        | 33.8                 |                 | 2.77          |             |             | 1           |             | 976.40     |         | 138         |    |
| ANTPDRLQQA               | N          | S       | 0.98        |           |                      |                 | 3.04          |             |             | 1           |             | 1113.56    |         | 149         |    |
| ANTPDRLQASLPL            | N          | L       | 0.98        |           |                      |                 | 3.35          |             |             | 1           |             | 1523.82    |         | 149         |    |
| CCQLQIQEQSRY             | Q          | E       | 1.00        |           |                      |                 | 9.01          |             |             | 1           |             | 1837.83    |         | 149         |    |
| QQIQEQSRY                | L          | E       | 1.00        | 59        | 31.7                 | 47.8            | 6.48          |             |             | 4           |             | 1148.57    |         | 154         |    |
| EAIRAIY                  | Y          | S       | 1.00        | 40.5      | 32.7                 | 11.5            | 3.48          | 2           |             | 9           |             | 948.55     |         | 163         |    |
| EAIRAIYSILQEQQQGF        | Y          | V       | 1.00        |           |                      |                 | 9.40          |             |             |             | 1           | 2220.20    |         | 163         |    |
| SILQEQQGF                | Y          | V       | 1.00        | 84.6      | 32.3                 | 74.8            | -2.61         |             |             | 1           |             | 1290.67    |         | 171         |    |
| GTKIKDAM                 | W          | I       | 0.99        | 25.6      | 34                   | 12.2            | 2.11          |             |             | 1           |             | 863.47     |         | 173         |    |
| VQPQQQQPQQSGQ            | F          | G       | 0.99        |           |                      |                 | 4.10          |             |             | 1           |             | 1480.71    |         | 182         |    |
| VQPQQQQPQQSGQVQSQQQQQQQL | F          | G       | 0.97        | 19        | 25                   | 7.97            | 1.92          |             |             |             | 1           | 2907.39    |         | 182         |    |
| GDSGGPL                  | M          | V       | 1.00        | 39.2      | 32.2                 | 7.74            | 2.40          | 2           |             |             |             | 602.28     |         | 193         |    |
| TLVGIVSW                 | W          | G       | 1.00        | 42.5      | 32.7                 | 31.6            | 2.37          | 2           |             | 1           |             | 874.50     |         | 208         |    |
| VGVSW                    | L          | G       | 0.95        | 32.5      | 32.3                 | 11.1            | 0.04          |             |             | 1           |             | 680.37     |         | 210         |    |
| ARVTALVNWVQQT            | Y          | A       | 0.98        |           |                      |                 | 3.41          |             |             | 4           |             | 1598.90    |         | 229         |    |
| QGTFLQPHQIAHLEAVTSIAL    | L          | R       | 0.97        |           |                      |                 | 4.11          |             |             |             | 2           | 2257.20    |         | 233         |    |
| LQPHQIAHL                | F          | E       | 1.00        | 40.9      | 32.4                 | 15.1            | 2.00          |             |             | 4           |             | 1056.60    |         | 237         |    |
| LQPHQIAHLEAVTS           | F          | I       | 1.00        |           |                      |                 | 8.64          |             |             | 1           |             | 1543.82    |         | 237         |    |
| EAVTSIAL                 | L          | R       | 0.99        | 50.3      | 32.5                 | 18.4            | 0.89          | 2           |             |             |             | 803.45     |         | 246         |    |
| RTLPTM                   | L          | C       | 0.93        | 18.9      | 33.4                 |                 | 0.89          | 1           |             |             |             | 718.39     |         | 254         |    |
| RTLPTMCSVNVPL            | L          | Y       | 1.00        | 61.7      | 32                   | 48.8            | -2.54         |             |             | 7           |             | 1487.77    |         | 254         |    |
| RTLPTMCSVNVPL            | L          | S       | 0.99        |           |                      |                 | 3.82          |             |             | 4           |             | 1650.83    |         | 254         |    |
| SATTSVPF                 | Y          | G       | 0.99        | 27.8      | 32.6                 |                 | 0.77          | 2           |             |             |             | 809.40     |         | 268         |    |
