# Supplementary material for: An asparagine residue at the N-terminus affects the maturation process of low molecular weight glutenin subunits of wheat endosperm
Source: PubMed Central journal article supplement (PMC4004387; doi:10.1186/1471-2229-14-64), 2014-03-14
Supplement: 1471-2229-14-64-S5.pdf [file 1471-2229-14-64-S5.pdf]

Table S4

Data for spot 5 showing identified sequence (highlighted in yellow) and a table showing identified peptides and associated ion statistics.

Modifications are shown in green; C, carbamidomethyl cysteine; M, oxidation; Q, deamidation. Note that not all cysteine residues are colored green although all have been converted to carboxymethyl amino cysteine. Modification of cysteine was defined in different Mascot searches as both a fixed and a variable modification in the database searching software. The result is that not all cysteine residues were color coded by the analysis software.

HB113T23H\_AR# (100%), 33,629.8 Da

ASN cleavage

19 exclusive unique peptides, 21 exclusive unique spectra, 40 total spectra, 159 295 amino acids (54% coverage)

```

S C I S G L E R P W Q Q O P L P P Q S F F S D Q P P F S Q Q Q Q Q P L P Q Q P S F S Q Q Q P P F S Q
O Q P I L S Q Q P P F S Q Q Q P V L P Q Q S P F S Q Q Q Q L V L P P Q Q Q Q Q L V D Q Q I P T I Y
Q P S V L G D L N P E W F L D Q Q S F V A M P Q R L A P S Q M W Q S S C H Y M Q D Q D Q D L
Q Q I P E Q S R Y E A I R A I Y S I I L Q E Q Q G F V D P Q Q Q P Q Q S G Q C V S Q S Q Q S
Q Q L L G Q C S F Q Q P Q Q L G Q Q P Q Q Q Q Q V L Q G T F L O P H O I A H L E A V T S I A L
R T L P T M C S V N V P L Y S A T T S V P F Q V G T G V G A Y H N H H H H D Y K D D D K
    
```

| Peptide                   | Amino Acid | Peptide | Mascot      | XI Tandem | Number of identified | *1H Peptide     | Peptide       |             |             |             |             |            |             |
|---------------------------|------------|---------|-------------|-----------|----------------------|-----------------|---------------|-------------|-------------|-------------|-------------|------------|-------------|
| Sequence                  | Prior      | Next    | Probability | Ion Score | Identify Score       | Delta Ion Score | -log(e) score | +1H spectra | +2H spectra | +3H spectra | +4H spectra | Mass (AMU) | Start index |
| SCISGLERPW                | -          | Q       | 0.997       | 59.2      | 42                   | 31.6            | 4.28          |             | 2           |             |             | 1204.58    | 1           |
| SCISGLERPWQQQLPPQSF       | -          | S       | 0.997       |           |                      |                 | 9.3           |             |             | 2           |             | 2463.21    | 1           |
| QQQLPPQSF                 | W          | S       | 0.996       | 22.3      | 22.3                 | 30.3            | 3.4           |             | 1           |             | 2           | 1297.65    | 11          |
| VLPPQQQQQL                | L          | V       | 0.997       | 31.9      | 12.6                 | 31.4            | 4             |             | 2           |             |             | 1306.71    | 82          |
| VLPPQQQQQLVQQQIPVPSVL     | L          | Q       | 0.997       | 64.4      | 64.4                 | 28.2            | 2.38          |             |             |             | 2           | 2736.54    | 82          |
| VQQQIPVPSVL               | L          | Q       | 0.997       | 52.2      | 37.5                 | 31.2            | 4.19          |             | 3           |             |             | 1448.85    | 93          |
| VQQQIPVPSVLQQLNPKVF       | L          | L       | 0.997       |           |                      |                 | 7.37          |             |             |             | 2           | 2563.41    | 93          |
| QIPVPSVLQQLNPKVF          | Q          | L       | 0.997       |           |                      |                 | 5.57          |             |             |             | 1           | 2208.22    | 96          |
| QQLNPKVF                  | L          | L       | 0.992       |           |                      |                 | 6.24          |             |             |             |             | 1116.55    | 106         |
| LQQGCSFVAMPQ              | F          | R       | 0.914       |           |                      |                 | 2.85          |             |             |             |             | 1386.65    | 115         |
| QQIPCSRY                  | L          | E       | 0.997       | 57.9      | 47.4                 | 31.7            |               |             |             |             |             | 1148.57    | 151         |
| EAIRAIY                   | Y          | S       | 0.985       | 49.7      | 13.2                 | 32.7            |               |             |             |             |             | 948.55     | 160         |
| EAIRAIYSILQEQGGF          | Y          | V       | 0.997       |           |                      |                 | 11.5          |             |             |             | 2           | 2220.20    | 160         |
| SILQEQGGF                 | Y          | V       | 0.997       | 80.6      | 69.1                 | 32.3            | 5.6           |             |             |             |             | 1250.67    | 168         |
| VPPQQQQPQSGGVSQSQQQ       | F          | S       | 0.983       |           |                      |                 | 4.33          |             |             |             | 1           | 2323.10    | 179         |
| LQPHQAHLEAVTSIALRTLPTMCSV | F          | N       | 0.856       |           |                      |                 | 3.31          |             |             |             |             | 2886.53    | 234         |
| RTLPTMCSVWVPL             | L          | Y       | 0.997       | 55        | 44.2                 | 32              | 1.99          |             |             |             | 1           | 1487.77    | 251         |
| HNNHHHDK                  | Y          | -       | 0.997       |           |                      |                 | 9.77          |             |             |             | 3           | 1707.66    | 282         |
| HNNHHHDKDDDK              | Y          | -       | 0.997       | 56.9      | 56.9                 | 29.1            | 6.24          |             |             |             | 2           | 1835.76    | 282         |
